# Supplementary material for: Actin Alpha 2, Smooth Muscle (ACTA2) Is Involved in the Migratory Potential of Malignant Gliomas, and Its Increased Expression at Recurrence Is a Significant Adverse Prognostic Factor
Source: MDPI journal article supplement (doi:10.3390/brainsci13101477), 2023-10-19

## Supplementary Materials

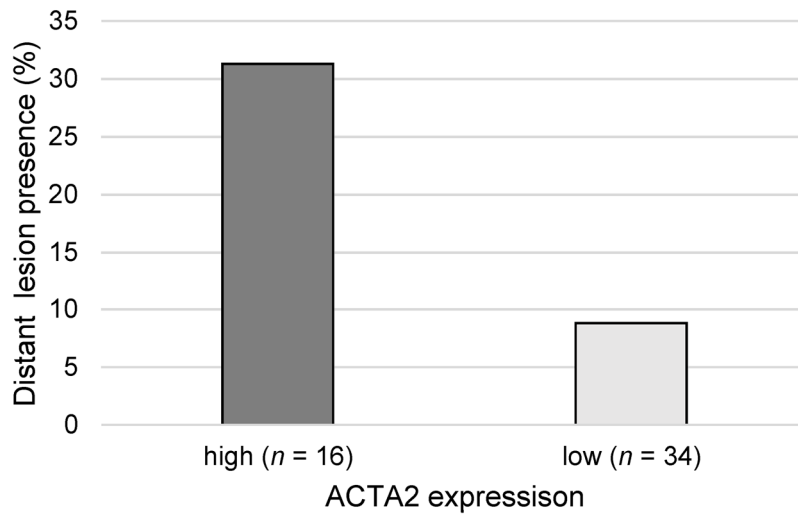

**Figure S1.** Relationship between distant disease at first presentation and ACTA2 expression level. We divided patients with primary malignant glioma ( $n = 50$ ) into two groups: the top third with high ACTA2 gene expression ( $n = 16$ ) and the remaining two-thirds of cases ( $n = 34$ ) and compared the proportion of cases with distant lesions that were not contiguous with the main tumor mass using Gd contrast-enhanced MRI images of the brain at initial onset. The ACTA2 high expression group ( $n = 16$ ) was significantly more likely to have distant lesions (31.3%) than the ACTA2 low expressing group ( $n = 34$ , 8.8%) ( $p = 0.044$ ). Statistical analysis was performed using Pearson's chi-square test.

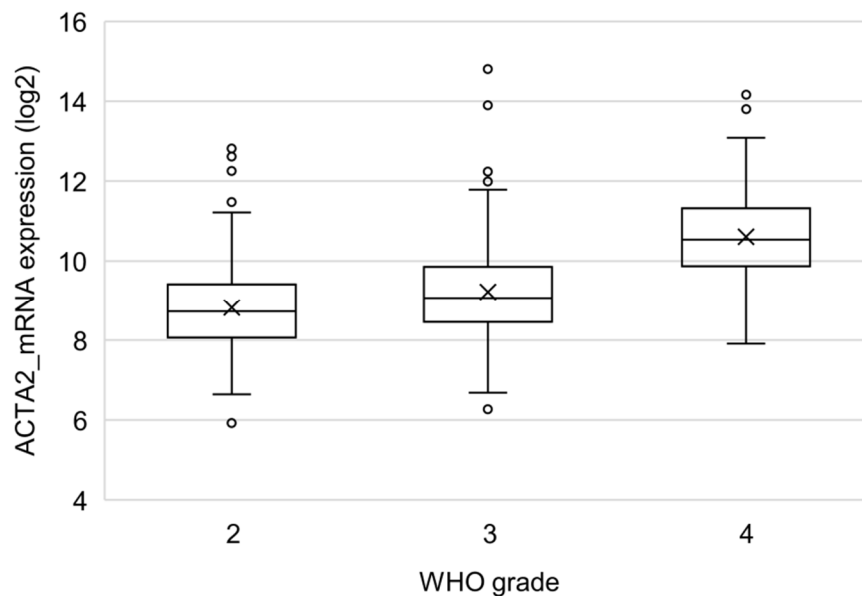

**Figure S2.** ACTA2 gene expression level by grade in WHO grade 2-4 clinical gliomas ( $n = 667$ ) in the TCGA cohort. ACTA2 expression was significantly higher in grade 4 gliomas ( $n = 153$ ) compared to grade 2 ( $n = 226$ ) and grade 3 gliomas ( $n = 244$ ) ( $p < 0.001$ ). Analysis of variance was performed to obtain the p-value.

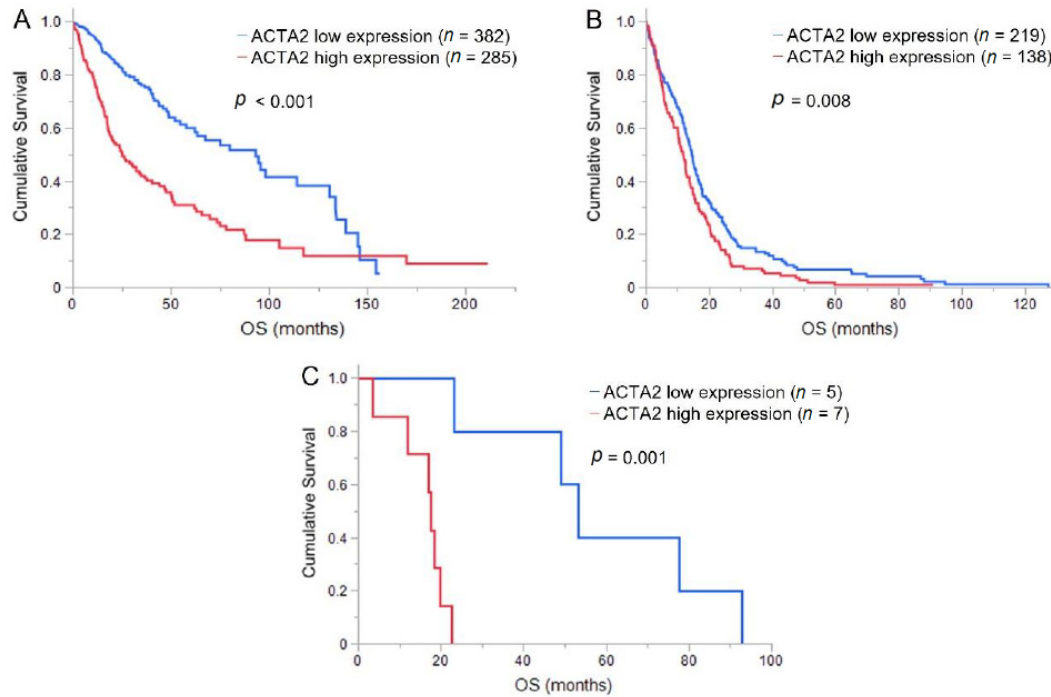

Supplement: s1 [file s1]
